# Supplementary material for: Incidence, risk factors, and outcomes for early postoperative seizures in dogs with rostrotentorial brain tumors after intracranial surgery
Source: PubMed Central journal article supplement — J Vet Intern Med. 2022 Feb 15;36(2):694–701. doi: 10.1111/jvim.16391 (PMC8965238; doi:10.1111/jvim.16391), 2022-02-15
Supplement: JVIM-36-694-s001.pdf [file JVIM-36-694-s001.pdf]

**Table S1:** Descriptive statistics of continuous variables

| Variable                          | Dogs | Mean | Standard Deviation | Median | Minimum | Maximum |
|-----------------------------------|------|------|--------------------|--------|---------|---------|
| Age (years)                       | 88   | 8.5  | 2.4                | 8      | 3       | 14      |
| Body weight (Kg)                  | 88   | 23.2 | 13.5               | 24     | 3       | 82      |
| KPS                               | 88   | 77   | 11.5               | 80     | 40      | 90      |
| Duration of clinical signs (days) | 88   | 68.5 | 50                 | 55     | 11      | 245     |

**Table S2:** Maintenance ACD therapy

| Maintenance ACD Therapy         | Number of dogs |
|---------------------------------|----------------|
| None                            | 24             |
| Phenobarbital                   | 21             |
| Levetiracetam                   | 9              |
| Zonisamide                      | 2              |
| Phenobarbital and Levetiracetam | 13             |
| Phenobarbital and Zonisamide    | 3              |
| Levetiracetam and Zonisamide    | 8              |
| Three or more ACDs              | 8              |
| Total                           | 88             |

**Table S3:** p-values for original hypotheses using univariate analysis of 88 surgical procedures

| Characteristic               | Categories                        | p value |
|------------------------------|-----------------------------------|---------|
| Previous structural epilepsy | Yes or No                         | 1       |
| Tumor location               | Temporal/Piriform, Frontal, Other | .23     |
| Additional perioperative ACD | Yes or No                         | .06     |
| Duration of Hospitalization  | Continuous variable               | <.001   |
| Survival to discharge        | Yes or No                         | .01     |

**Table S4:** p-values for additional hypotheses using univariate analysis of 88 surgical procedures

| Characteristic                 | Categories                                                               | p value |
|--------------------------------|--------------------------------------------------------------------------|---------|
| Surgical procedure             | SBB, therapeutic intent                                                  | .11     |
| Maintenance anticonvulsant     | None, phenobarbital, levetiracetam or zonisamide, two or more            | .13     |
| T2W Tumor Volume               | Continuous variable                                                      | .4      |
| Tumor:Brain Volume             | Ratio, continuous variable                                               | .3      |
| Tumor type                     | Glioma, meningioma, others                                               | .0003   |
| Tumor enhancement              | None, mild, moderate, marked                                             | .04     |
| Brain herniation               | None, subfalcine, trans-tentorial, foramen magnum, 2 or more herniations | .44     |
| Peritumoral edema              | Yes or no                                                                | .13     |
| KPS - preoperative             | Continuous variable                                                      | .05     |
| Post op neuro complication     | Yes or no                                                                | .01     |
| post-op non neuro complication | Yes or no                                                                | .27     |
